# Supplementary material
Source: publisher figshare collection journal article supplement (https://sage.figshare.com/ndownloader/files/22781915)
Supplement: Supplementary file 1 [file 22781915]

## Supplementary Material

### One. Interview schedule

| Identifier | Position                                  | Method    | Date       | Duration (hours) |
|------------|-------------------------------------------|-----------|------------|------------------|
| One        | Senior Advisor                            | Skype     | 02/04/18   | 0.55             |
| Two        | Senior Economist                          | Skype     | 05/04/2018 | 0.47             |
| Three      | Principal Advisor                         | Skype     | 06/04/2018 | 0.39             |
| Four       | Head of continuous improvement            | Telephone | 06/04/2018 | 1.12             |
| Five       | Team Leader                               | Skype     | 11/04/2018 | 0.58             |
| Six        | Senior Advisor                            | Skype     | 12/04/2018 | 0.43             |
| Seven      | Programme Manager                         | Skype     | 16/04/2018 | 0.56             |
| Eight      | Senior Research Officer                   | Skype     | 16/04/2018 | 0.41             |
| Nine       | Head of Corporate Planning and Governance | Skype     | 23/04/2018 | 1.06             |
| Ten        | Portfolio Director                        | Skype     | 25/04/2018 | 1.01             |
| Eleven     | Senior Adviser                            | Telephone | 25/04/2018 | 0.55             |
| Twelve     | Senior Advisor                            | Skype     | 13/05/2018 | 1.30             |

## Two. Semi-structured interview questions

| Question order: | Question:                                                                                                                                                                                       |
|-----------------|-------------------------------------------------------------------------------------------------------------------------------------------------------------------------------------------------|
| Question One    | What do you understand an ecosystem approach or SMNR to mean?                                                                                                                                   |
| Question Two    | Why is an ecosystem approach or SMNR the right approach for NRW to adopt?                                                                                                                       |
| Question Three  | What do you understand complexity to mean in the context of the governance and management of natural resources?                                                                                 |
| Question Four   | How are NRW operationalising SMNR?                                                                                                                                                              |
| Question Five   | In what way does SMNR help to address the governance and management of natural resources across different disciplines, and or scales?                                                           |
| Question Six    | Can you describe the 'journey' that NRW are on in terms of instituting the processes, forms, and thinking of SMNR; where are NRW on this journey, what is next, and where is the 'destination'? |
| Question Seven  | In what way have the different organisational legacy cultures that different colleagues brought to NRW been transformed into new and uniquely NRW style of leadership, processes, and culture?  |
| Question Eight  | How would you describe the culture within NRW?                                                                                                                                                  |
| Question Nine   | How does this culture account for socio-ecological complexity?                                                                                                                                  |
| Question Ten    | How are NRW evaluating their internal operationalisation of SMNR?                                                                                                                               |
| Question Eleven | How does the organisational culture(s) affect how NRW evaluates itself?                                                                                                                         |
| Question Twelve | What are the most significant future challenges facing NRW, its culture, and delivering its complexity mandate?                                                                                 |

### Three. Data analysis nodes

| Parent node                           | Child nodes                                                                                                                                                                                                             |
|---------------------------------------|-------------------------------------------------------------------------------------------------------------------------------------------------------------------------------------------------------------------------|
| SMNR/EA for managing nexus complexity | Legal/statutory imperative<br>Originality & Effectiveness<br>Advantages/disadvantages of ESA/SMNR<br>'First-mover' advantage/challenges<br>Nexus complexity challenges<br>Journey towards SMNR                          |
| About NRW                             | Legacy(ies)<br>Challenges and opportunities of 'new' agency<br>Processes, artefacts, architectures<br>Clean sheet-ism                                                                                                   |
| Culture in NRW                        | Why culture?<br>Can culture be influenced/affected?<br>Witnessing culture<br>Culture and bureaucrats<br>Leadership<br>Culture and process<br>Culture and structure<br>Legacy 'sticking points'<br>Narratives of culture |
